# Supplementary material for: Real-Time Longitudinal Evaluation of Tumor Blood Vessels Using a Compact Preclinical Fluorescence Imaging System
Source: Biosensors (Basel). 2021 Nov 23;11(12):471. doi: 10.3390/bios11120471 (PMC8699707; doi:10.3390/bios11120471)
Supplement: Supplementary file 1 [file biosensors-11-00471-s001.zip › biosensors-1417297_supplemental document.pdf]

## Supplementary Information

# Real-time longitudinal evaluation of tumor blood vessels using a compact preclinical fluorescence imaging system

Hoibin Jeong<sup>1,5</sup>, Song-Rae Kim<sup>1,5</sup>, Yujung Kang<sup>2</sup>, Huisu Kim<sup>2</sup>, Seo-Young Kim<sup>1,3</sup>, Su-Hyeon Cho<sup>1</sup>, Kil-Nam Kim<sup>1,4,\*</sup>

<sup>1</sup>Chuncheon Center, Korea Basic Science Institute (KBSI), Chuncheon 24341, Republic of Korea

<sup>2</sup>Vieworks, Anyang 14055, Republic of Korea

<sup>3</sup>Division of Practical Application, Honam National Institute of Biological Resources, Mokpo 58762, Republic of Korea

<sup>4</sup>Department of Bio-Analytical Science, University of Science and Technology, Daejeon 34113, Republic of Korea

<sup>5</sup>These authors contributed equally to this work

\* knkim@kbsi.re.kr (K.-N. Kim).

## Supplementary figures

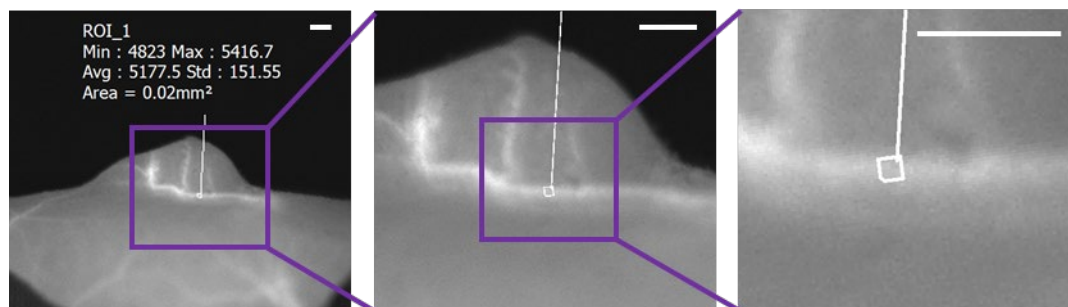

**Figure S1.** ROI drawn to include only the blood vessel area. Purple rectangles are enlarged on the right-hand side. Scale bar, 1 mm

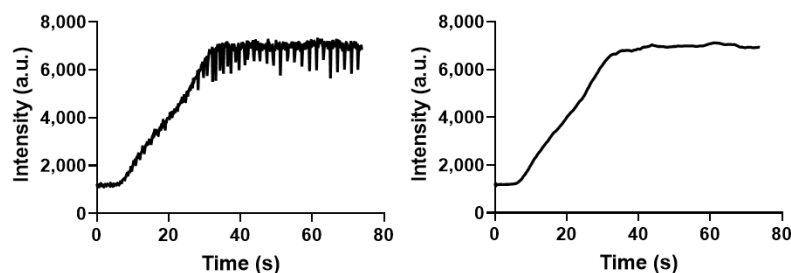

**Figure S2.** ICG dynamics of a pixel on tumor blood vessel when mouse movement due to breathing is reflected (left) and when artifacts are removed using Savitzky-Golay Filter (right).

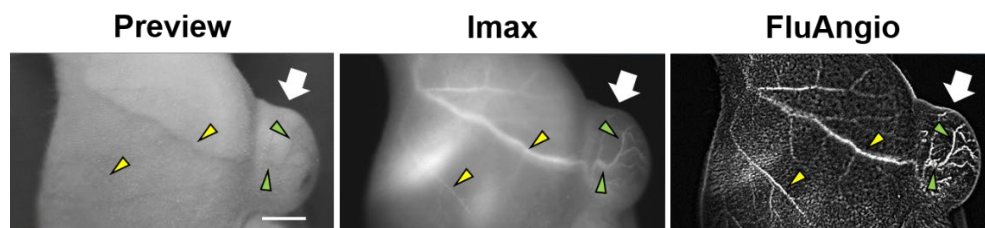

**Figure S3.** Preview (photograph), Imax, and FluAngio maps in an A431 tumor-bearing mouse. White arrows indicate the A431 tumor. Yellow or green arrowheads indicate blood vessels in the tumor periphery or within the tumor, respectively. Scale bar, 5 mm.

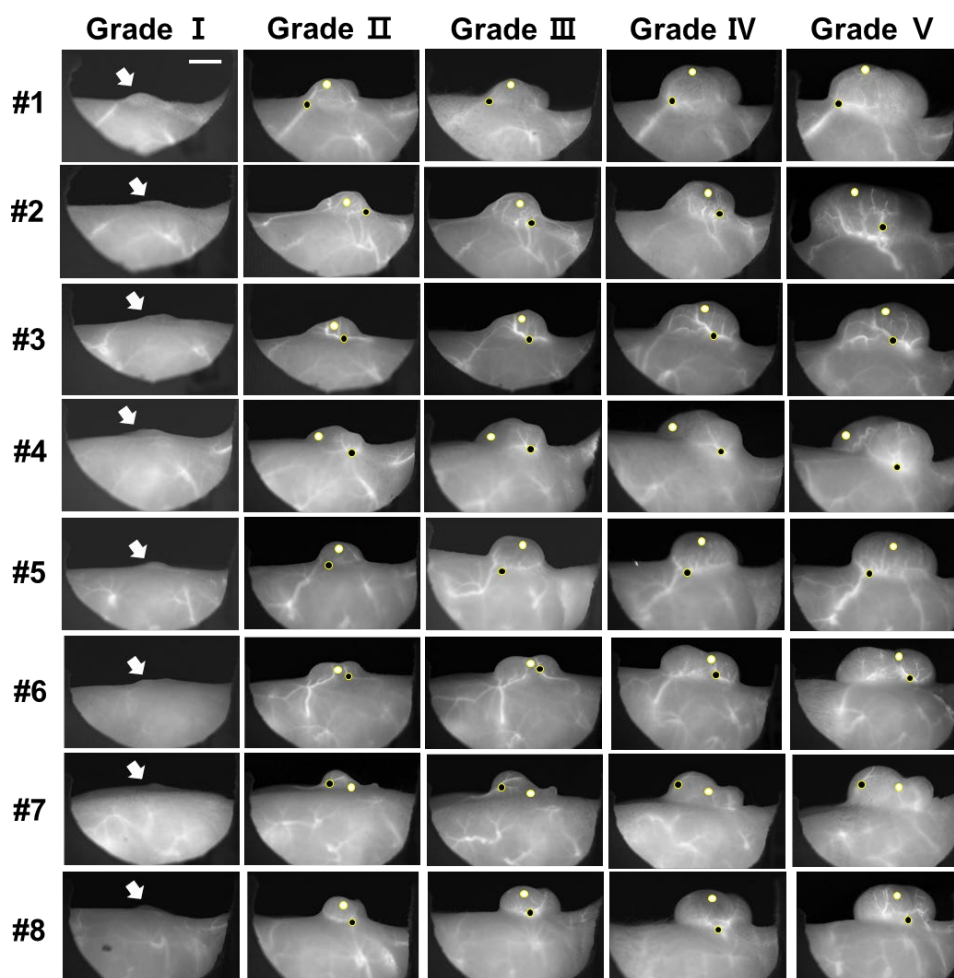

**Figure S4.** Fluorescence images of A431 tumors for each grade determined based on the tumor size. The white arrow on Grade I indicates the location of the small palpable tumor. In Grades II, III, IV, and V, black circles indicate blood vessels and white circles indicate outer areas. Tumor #3 is the one in Figure 4A. Scale bar, 5 mm.

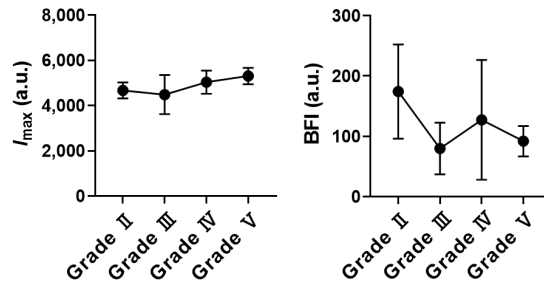

**Figure S5.** Changes in  $I_{\max}$  and BFI when the entire tumor area is designated as an ROI by grade. Data are the mean  $\pm$  SD for  $n = 8$  mice per grade.

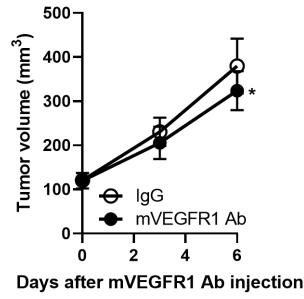

**Figure S6.** Growth of A431 tumors in mice injected with IgG or mVEGFR1 Ab twice every three days. Data are the mean  $\pm$  SD for  $n \geq 7$  mice per group. \*,  $P < 0.05$  determined via two-way ANOVA.

## Supplementary tables

|                     | Ultrasound Doppler Flowmetry | Laser Doppler Flowmetry | Laser Speckle Contrast Imager | VISQUE® InVivo Smart-LF         |
|---------------------|------------------------------|-------------------------|-------------------------------|---------------------------------|
| Temporal Resolution | A few seconds                | A few minutes           | a few seconds                 | Once at a time                  |
| Spatial Resolution  | -                            | 1 mm – 0.1 mm           | tens of micrometer            | 27 $\mu\text{m}$ (@3 $\times$ ) |
| Imaging Depth       | A few mm depth               | Less than 1 mm depth    | Less than 1 mm depth          | According to the FL dye         |
| Imaging Target      | RBC                          | RBC                     | RBC                           | Fluorescence dye in blood       |

**Table S1.** Comparison of VISQUE® InVivo Smart-LF equipment and other optical *in vivo* imaging systems for small animals with resolution, imaging depth and target.

| Model       | VSP-4MU                                           |
|-------------|---------------------------------------------------|
| Resolution  | 2048(H) $\times$ 2048(V)                          |
| Sensor Type | Backside Illuminated Scientific CMOS Image Sensor |

|                                      |                                              |
|--------------------------------------|----------------------------------------------|
| Pixel Size                           | 6.5 $\mu\text{m}$ $\times$ 6.5 $\mu\text{m}$ |
| Optical Format                       | 1.2"                                         |
| Cooling Method                       | Thermoelectric Peltier Cooling               |
| Cooling Performance                  | 50°C below ambient temperature               |
| Quantum Efficiency                   | Max. 94 % @ 550 nm                           |
| Full Well Capacity                   | 54 ke <sup>-</sup>                           |
| Max. Frame Rate                      | 37 fps                                       |
| Exposure Time (1 $\mu\text{s}$ step) | 11 $\mu\text{s}$ ~ 6 s                       |
| Binning                              | 2 $\times$ 2, 4 $\times$ 4                   |
| Output Format                        | Mono 16                                      |
| Lens Mount                           | C-mount                                      |
| Interface                            | USB 3.0                                      |

**Table S2.** Specifications for the sCMOS camera, VSP-4MU.

| Model                              | VISQUE® InVivo Smart LF                                   |
|------------------------------------|-----------------------------------------------------------|
| Weight and Dimension               | About 20 kg (44 lbs), 40 cm $\times$ 40 cm $\times$ 57 cm |
| Sensor                             | 1.2" Backside Illuminated sCMOS                           |
| Cooling                            | -20°C, Thermoelectric Peltier Cooling                     |
| Resolution (H $\times$ V)          | 1824 $\times$ 1824                                        |
| Pixel Size                         | 6.5 $\mu\text{m}$ $\times$ 6.5 $\mu\text{m}$              |
| Exposure Time                      | 25 ms – 30 mins                                           |
| Maximum Frame Rate                 | 37 fps                                                    |
| Digital Output                     | 16 bit                                                    |
| Binning                            | 1 $\times$ 1, 2 $\times$ 2, 4 $\times$ 4                  |
| Fluorescence Light Source          | LED                                                       |
| Fluorescence Emission Filter       | Up to 9, Optional                                         |
| Lens Control                       | Motorized Iris / Zoom / Focus                             |
| Zoom (Field of View, H $\times$ V) | 15 cm x 15 cm (1 $\times$ ) – 5 cm x 5 cm (3 $\times$ )   |
| Stage Type                         | Sliding stage, Up to 3 mice                               |
| Accessory                          | Heating stage, Anesthesia Ventilator Adaptor              |

**Table S3.** Specifications for the VISQUE® InVivo Smart-LF equipment.
